# Supplementary material for: 2,2′:6′,2″-Terpyridine-4′(1′H)-thione: a missing link in metallosupramolecular chemistry
Source: Royal Society of Chemistry journal article supplement (doi:10.1039/b510792j), 2005-01-01
Supplement: b510792j.pdf [file b510792j.pdf]

## Electronic Supplementary Information

### 2,2':6',2''-Terpyridine-4'(1'*H*)-thione: a missing link in metallo-supramolecular chemistry

Edwin C. Constable,<sup>\*a</sup> B. A. Hermann,<sup>b</sup> Catherine E. Housecroft,<sup>a</sup> Markus Neuburger,<sup>a</sup>  
Silvia Schaffner,<sup>a</sup> Lukas Scherer

<sup>a</sup> Department of Chemistry, University of Basel, Spitalstrasse 51, 4056 Basel, Switzerland. Fax: +41 61 267 1018; Tel: +41 61 267 1001; Email: edwin.constable@unibas.ch

<sup>b</sup> WMI / CeNS, LMU Munich, Walther-Meissner-Str. 8, 85748 Garching, Germany. Fax: +49 89 289 14258; Tel: +49 89 289 14206

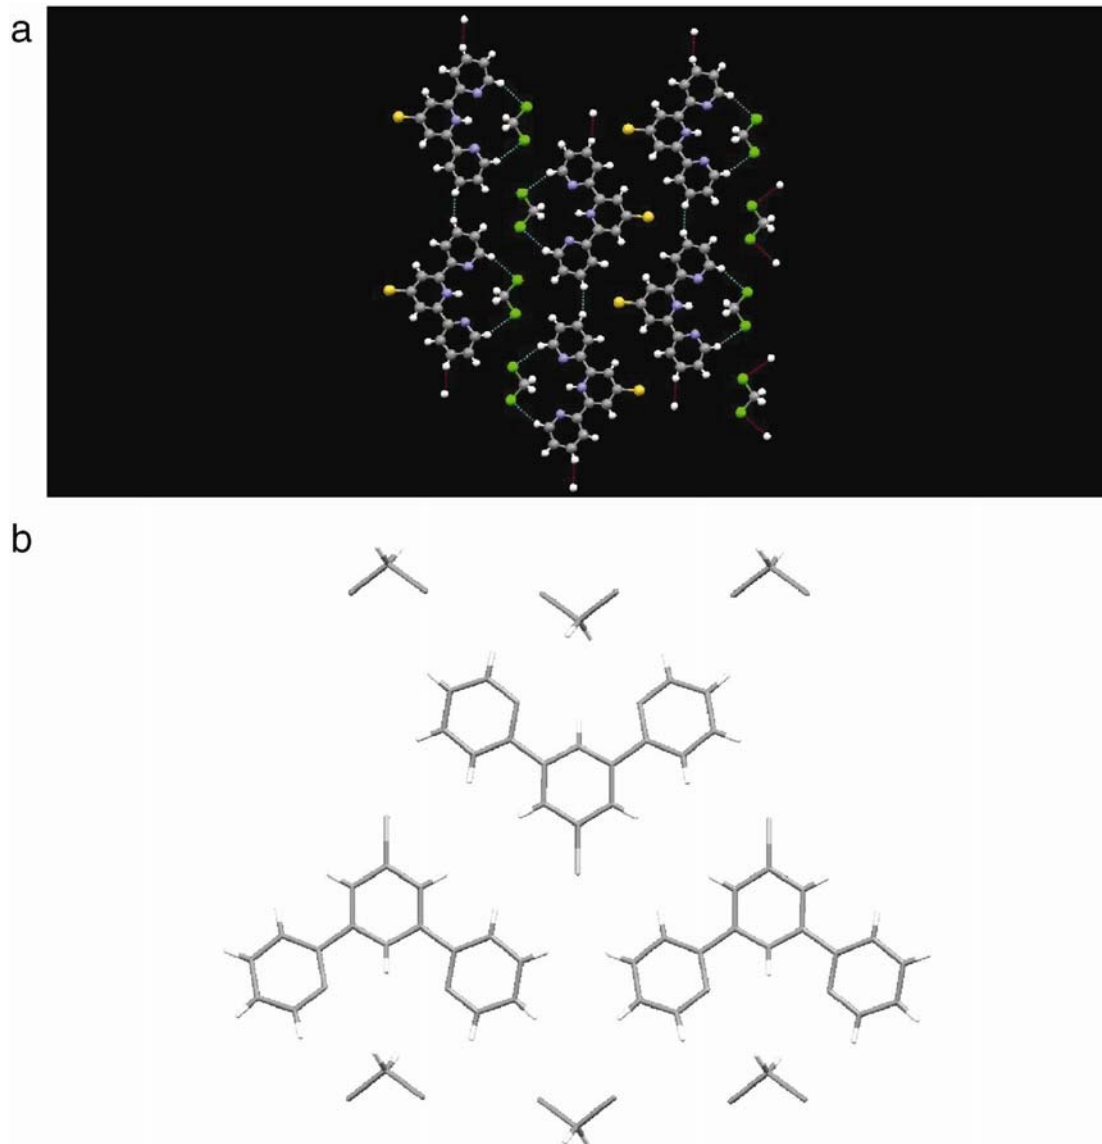

Figure 2 Sheets are formed containing {1.CH<sub>2</sub>Cl<sub>2</sub>} units linked by non-classical C-H...X interactions to both the solvent molecule and the sulfur of another molecule of 1.

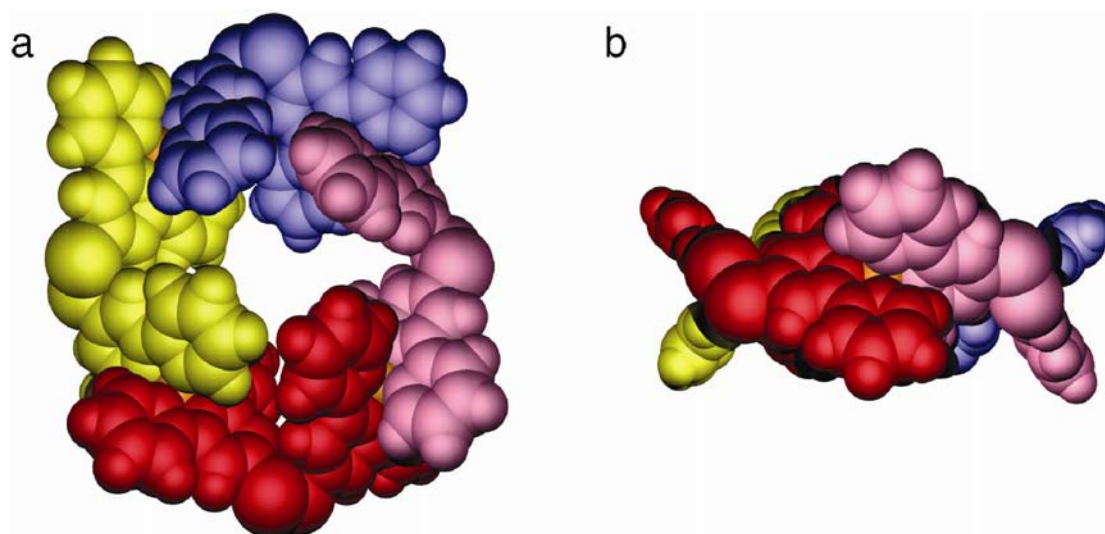

Figure 6 Space-filling representations of the metallomacrocyclic  $[\text{Fe}_4(2)_4]^{8+}$  cation in  $[\text{Fe}_4(2)_4][\text{BF}_4]_8$  from (a) above and (b) the side. The individual ligands have been coloured to assist the viewer.
